# Supplementary material
Source: PubMed Central journal article supplement (PMC7739194)
Supplement: jamapediatr-e205667-s001.pdf [file jamapediatr-e205667-s001.pdf]

## Supplemental Online Content

Miech R, Leventhal A, Johnston L, O'Malley PM, Patrick ME, Barrington-Trimis J. Trends in use and perceptions of nicotine vaping among US youth from 2017 to 2020. *JAMA Pediatr*. Published online December 15, 2020. doi:10.1001/jamapediatrics.2020.5667

**eFigure.** Demographics and Use Levels of Selected Substances in 2020 and Previous Years among U.S. 10th and 12th Grade Students

**eTable 1.** Survey Question Wording, Response Categories, and Sample Sizes

**eTable 2.** Comparison of Demographics in 2020 with Previous Years among U.S. 10th and 12th Grade Students

**eTable 3.** Comparison of Lifetime Use Levels of Selected Drugs in 2020 with Previous Years among U.S. 10th and 12th Grade Students

**eTable 4.** Observed Prevalence of Nicotine Vaping by Year and Reporting Interval, And Coefficients for Predicted Values

**eTable 5.** Prevalence of JUUL Use by Year and Reporting Interval

**eTable 6.** Sample Sizes by Survey Question and Year for Surveys Collected on March 14th or Earlier in All Years

**eTable 7.** Comparison of 2020 Demographics with Previous Years among U.S. 10th and 12th Grade Students, Samples in All Years Limited to Surveys Collected on March 14 or Earlier

**eTable 8.** Comparison of Lifetime Use Levels of Selected Drugs in 2020 with Previous Years among U.S. 10th and 12th Grade Students, Samples in All Years Limited to Survey Collected on March 14 or Earlier

**eTable 9.** Observed Prevalence of Nicotine Vaping by Year and Reporting Interval for Surveys Collected on March 14th or Earlier in All Years

**eTable 10.** Prevalence of JUUL Use by Year and Reporting Interval for Surveys Collected on March 14th or Earlier in All Years

**eTable 11.** Prevalence of Vaping Brands Reported Most Often Used among 10th and 12th Grade Students Who Vaped Nicotine in the Past 30 Days for Surveys Collected on March 14th or Earlier in All Years, by Year

**eTable 12.** Percent 10th and 12th Grade Students Who Vaped Nicotine in the Past 30 Days and Reported Getting Selected Vaping Materials Would Be “Fairly Easy” or “Very Easy” for Surveys Collected on March 14th or Earlier in All Years, by Year

**eTable 13.** Percent of 10th and 12th Grade Students Who Report Perceived Risk of “Great Harm” from Occasional and Regular Nicotine Vaping for Surveys Collected on March 14th or Earlier in All Years, by Year

This supplemental material has been provided by the authors to give readers additional information about their work.

## eFigure: Demographics and Use Levels of Selected Substances in 2020 and Previous Years among U.S. 10th and 12th Grade Students

### Demographics

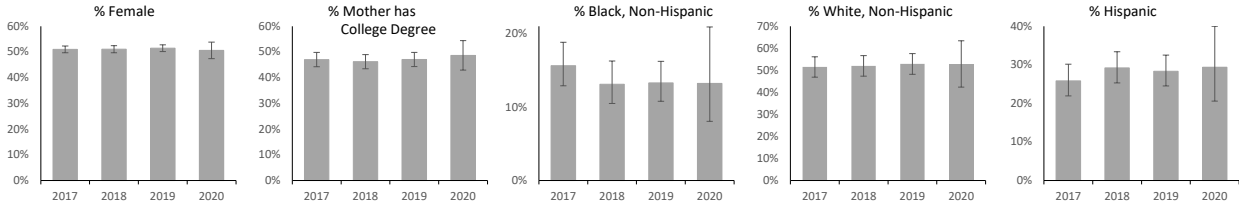

### Lifetime Substance Use

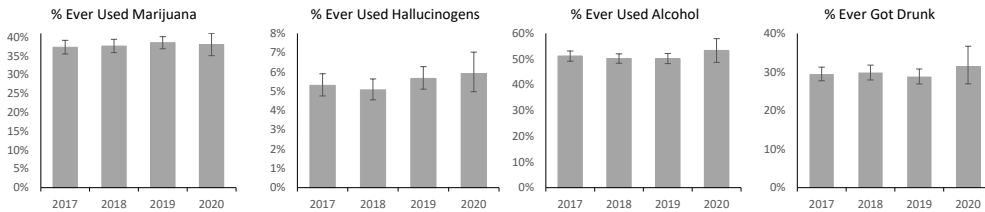

Note: Bars indicate 95% confidence intervals. For exact estimates, see eTables 2-3. Substances with highly stable prevalence levels in recent years selected for this comparison. Differences between 2020 and 2019 estimates are not significantly different ( $p < .05$ ) for any of these outcomes.

| <b>eTable 1: Survey Question Wording, Response Categories, and Sample Sizes</b>                                                                                                                                                                                                                                                                                                                                                                                                                                                                                                                                                                                                                                                                                                                                                                                                                                                                                                                                                                                                            |                        |       |        |       |
|--------------------------------------------------------------------------------------------------------------------------------------------------------------------------------------------------------------------------------------------------------------------------------------------------------------------------------------------------------------------------------------------------------------------------------------------------------------------------------------------------------------------------------------------------------------------------------------------------------------------------------------------------------------------------------------------------------------------------------------------------------------------------------------------------------------------------------------------------------------------------------------------------------------------------------------------------------------------------------------------------------------------------------------------------------------------------------------------|------------------------|-------|--------|-------|
| Question                                                                                                                                                                                                                                                                                                                                                                                                                                                                                                                                                                                                                                                                                                                                                                                                                                                                                                                                                                                                                                                                                   | Unweighted Sample Size |       |        |       |
|                                                                                                                                                                                                                                                                                                                                                                                                                                                                                                                                                                                                                                                                                                                                                                                                                                                                                                                                                                                                                                                                                            | 2017                   | 2018  | 2019   | 2020  |
| <p><b>Nicotine Vaping<sup>a</sup></b></p> <p>To "vape" is to use a device such as a JUUL, vape-pen, e-cigarette, e-hookah, or e-vaporizer to inhale a vapor into the lungs.<sup>b</sup></p> <p>Have you ever vaped? 0="No" 1="Yes"</p> <p>If yes:</p> <p>In 2019 and 2020 asked:<br/>On how many DAYS (if any) have you vaped NICOTINE... 1="0 Days" 2="1-2 Days" 3="3-5 Days" 4="6-9 Days" 5="10-19 Days" 6="20 or More"</p> <ul style="list-style-type: none"> <li>• ...in your lifetime?</li> <li>• ...during the last 12 months?</li> <li>• ...during the last 30 days?</li> </ul> <p>"Daily" nicotine vaping coded as answer of 6</p> <p>In 2017-18 asked:<br/>On how many occasions (if any) have you vaped NICOTINE... 1="0 Occasions" 2="1-2 Occasions" 3="3-5 Occasions" 4="6-9 Occasions" 5="10-19 Occasions" 6="20-29 Occasions" 7="40 or more"</p> <ul style="list-style-type: none"> <li>• ...in your lifetime?</li> <li>• ...during the last 12 months?</li> <li>• ...during the last 30 days?</li> </ul> <p>For all years, any answer of 2 or more indicates prevalence</p> | 8,556                  | 9,031 | 17,442 | 8,392 |
| <p><b>JUUL use<sup>a</sup></b></p> <p>[picture of pod device here]</p> <p>This is a JUUL</p> <p>On how many DAYS (if any) have you used a JUUL with a standard pod (that is, the types of pods for sale at most convenience stores)? 1="0 Days" 2="1-2 Days" 3="3-5 Days" 4="6-9 Days" 5="10-19 Days" 6="20 or More"</p> <ul style="list-style-type: none"> <li>• ...in your lifetime?</li> <li>• ...during the last 12 months?</li> <li>• ...during the last 30 days?</li> </ul> <p>"Daily" nicotine vaping coded as answer of 6</p> <p>For all years, any answer of 2 or more indicates prevalence</p>                                                                                                                                                                                                                                                                                                                                                                                                                                                                                   |                        |       | 3,984  | 8,443 |

|                                                                                                                                                                                                                                                                                                                                                                                                                                                                                                                                                                                                                                       |        |        |        |       |
|---------------------------------------------------------------------------------------------------------------------------------------------------------------------------------------------------------------------------------------------------------------------------------------------------------------------------------------------------------------------------------------------------------------------------------------------------------------------------------------------------------------------------------------------------------------------------------------------------------------------------------------|--------|--------|--------|-------|
| <p><b>Vaping Brand<sup>c</sup></b><br/> In 2020 question was:<br/> What is the brand name of the vaping device you use most often? 1="JUUL" 2="SMOK" 3="Suorin" 4="Vuse" 5="Stig" 6="Other...[please write in]"</p> <p>In 2019 question was:<br/> What is the brand name of the vaping device you use most often? 1="JUUL" 2="KandyPens" 3="Vuse" 4="blu" 5="Other...[please write in]" 6="MarkTen" 7="Logic" 8="bo" 9="Myle" 10="PHIX" 11="SMOK" 12="SMPO" 13="Suorin" 14="ZOOR"</p> <p>For study analyses 2019 responses for brands not on 2020 version of question coded as "Other"</p>                                            |        |        | 1,916  | 1,744 |
| <p><b>Perceived Accessibility of Vaping Devices<sup>c,d</sup></b><br/> To "vape" is to use a device such as a JUUL, vape-pen, e-cigarette, e-hookah, or e-vaporizer to inhale a vapor into the lungs. How difficult do you think it would be for you to get each of the following, if you wanted some? 1="Probably Impossible" 2="Very Difficult" 3="Fairly Difficult" 4="Fairly Easy" 5="Very Easy"</p> <ul style="list-style-type: none"> <li>• Vaping device (JUUL, e-cigarette, e-pen, etc.)</li> </ul> <p>Answers 4 and 5 indicates "fairly or very easy"</p>                                                                    | 591    | 1,235  | 1,408  | 546   |
| <p><b>Perceived Accessibility of Nicotine Solutions for Vaping<sup>c,d</sup></b><br/> To "vape" is to use a device such as a JUUL, vape-pen, e-cigarette, e-hookah, or e-vaporizer to inhale a vapor into the lungs. How difficult do you think it would be for you to get each of the following, if you wanted some? 1="Probably Impossible" 2="Very Difficult" 3="Fairly Difficult" 4="Fairly Easy" 5="Very Easy"</p> <ul style="list-style-type: none"> <li>• E-liquid with nicotine (for vaping)</li> </ul> <p>Answers 4 and 5 indicates "fairly or very easy"</p>                                                                | 593    | 1,237  | 1,409  | 690   |
| <p><b>Perceived Accessibility of Flavored Nicotine Solutions<sup>c</sup></b><br/> To "vape" is to use a device such as a JUUL, vape-pen, e-cigarette, e-hookah, or e-vaporizer to inhale a vapor into the lungs. How difficult do you think it would be for you to get each of the following, if you wanted some? 1="Probably Impossible" 2="Very Difficult" 3="Fairly Difficult" 4="Fairly Easy" 5="Very Easy"</p> <ul style="list-style-type: none"> <li>• E-liquid with nicotine (for vaping) with a flavor other than tobacco or menthol, such as mint or mango</li> </ul> <p>Answers 4 and 5 indicates "fairly or very easy"</p> |        |        |        | 688   |
| <p><b>Perceived Risk of Nicotine Vaping</b><br/> How much do you think people risk harming themselves (physically or in other ways) if they . . . "</p> <p>1="No Risk" 2="Slight Risk" 3="Moderate Risk" 4="Great Risk" 5="Can't Say, Drug Unfamiliar"</p> <ul style="list-style-type: none"> <li>• Vape an e-liquid with nicotine occasionally?</li> <li>• Vape an e-liquid with nicotine regularly?</li> </ul> <p>Answer "4" indicates great risk; answers of "5" included in denominator</p>                                                                                                                                       | 8,864  | 9,452  | 9,129  | 3,474 |
| <p><b>Female</b><br/> What is your sex? 1="Male" 2="Female"</p>                                                                                                                                                                                                                                                                                                                                                                                                                                                                                                                                                                       | 25,725 | 27,057 | 26,715 | 8,430 |

|                                                                                                                                                                                                                                                                                                                                                                                                                                                                                                                                                                                                                                                                                                              |        |        |        |       |
|--------------------------------------------------------------------------------------------------------------------------------------------------------------------------------------------------------------------------------------------------------------------------------------------------------------------------------------------------------------------------------------------------------------------------------------------------------------------------------------------------------------------------------------------------------------------------------------------------------------------------------------------------------------------------------------------------------------|--------|--------|--------|-------|
| <p><b>Mother Has College Degree</b><br/> What is the highest level of schooling your mother completed? 1="Completed grade school or less" 2="Some high school" 3="Completed high school" 4="Some college" 5="Completed college" 6="Graduate or professional school after college" 7="Don't know, or does not apply"</p> <p>Answer "5" or "6" indicates mother with college education; answer "7" not included in analyses</p>                                                                                                                                                                                                                                                                                | 24,525 | 25,836 | 24,969 | 7,764 |
| <p><b>Race/Ethnicity</b><br/> How do you describe yourself?</p> <ul style="list-style-type: none"> <li>• Black or African American</li> <li>• Mexican American or Chicano</li> <li>• Cuban American</li> <li>• Puerto Rican Other Hispanic or Latino</li> <li>• Asian American</li> <li>• White (Caucasian)</li> <li>• American Indian or Alaska Native</li> <li>• Native Hawaiian or Other Pacific Islander</li> </ul> <p>Responses coded to indicate Black, Non-Hispanic, White Non-Hispanic, and Hispanic</p>                                                                                                                                                                                             | 25,728 | 27,162 | 26,321 | 8,145 |
| <p><b>Lifetime Marijuana Use</b><br/> On how many occasions (if any) have you used marijuana . . . 1="0" 2="1-2" 3="3-5" 4="6-9" 5="10-19" 6="20-39" 7="40+"<br/> • . . . in your lifetime?</p> <p>Any answer of 2 or more indicates prevalence</p>                                                                                                                                                                                                                                                                                                                                                                                                                                                          | 26,235 | 27,687 | 26,982 | 8,390 |
| <p><b>Lifetime Hallucinogen Use</b><br/> The next questions are about LSD, the hallucinogenic drug which is sometimes called "acid". On how many occasions (if any) have you taken LSD . . . 1="0" 2="1-2" 3="3-5" 4="6-9" 5="10-19" 6="20-39" 7="40+"<br/> • . . . in your lifetime?</p> <p>The next questions are about HALLUCINOGENS OTHER THAN LSD. This group would include the following drugs: Mescaline, Peyote, "Shrooms" or Psilocybin, PCP. On how many occasions (if any) have you taken hallucinogens other than LSD . . . 1="0" 2="1-2" 3="3-5" 4="6-9" 5="10-19" 6="20-39" 7="40+"<br/> • . . . in your lifetime?</p> <p>Any answer of 2 or more on either question indicates prevalence.</p> | 24,128 | 25,436 | 24,942 | 7,822 |
| <p><b>Lifetime Alcohol Use</b><br/> On how many occasions (if any) have you had any alcoholic beverage to drink—more than just a few sips... 1="0" 2="1-2" 3="3-5" 4="6-9" 5="10-19" 6="20-39" 7="40+"<br/> • . . . in your lifetime?</p> <p>Any answer of 2 or more indicates prevalence</p>                                                                                                                                                                                                                                                                                                                                                                                                                | 25,726 | 27,210 | 26,572 | 8,220 |
| <p><b>Lifetime Getting Drunk</b><br/> On how many occasions (if any) have you been drunk or very high from drinking alcoholic beverages. . . 1="0" 2="1-2" 3="3-5" 4="6-9" 5="10-19" 6="20-39" 7="40+"<br/> • . . . in your lifetime?</p> <p>Any answer of 2 or more indicates prevalence</p>                                                                                                                                                                                                                                                                                                                                                                                                                | 16,896 | 17,769 | 17,382 | 5,700 |

Note: Estimates for all measures are nationally-representative. Sample sizes vary both due to size of randomly-selected subgroup that received questions and also the abbreviated data collection in 2020. In 2019 a randomly-selected half of schools recorded their answers on electronic tablets and in the other half used paper and pencil. In all analyses responses from both survey modes are combined because prevalence differences across the modes were negligible. (Before 2019 all responses were on paper and pencil, and in 2020 all responses were on electronic tablets.)

<sup>a</sup>Across reporting intervals (e.g., lifetime, past 12-month, past 30-day, and daily) sample size varies between 99% and 100% of sample size reported here.

<sup>b</sup>The example of JUUL was first added to the stem question for a randomly-selected half of these questions in 2019. Prevalence of nicotine vaping was 3 points higher on questionnaires with the JUUL example compared to those without it. All questionnaires included the example of JUUL in the stem question in 2020.

<sup>c</sup>Sample size in analyses and reported here restricted to youth who vaped nicotine in the past 30 days.

<sup>d</sup>JUUL first included as an example in the stem question in 2020, for all questionnaires on which this question appeared.

| <b>eTable 2: Comparison of Demographics in 2020 with Previous Years among U.S. 10<sup>th</sup> and 12<sup>th</sup> Grade Students</b> |                  |                           |                     |                     |                  |
|---------------------------------------------------------------------------------------------------------------------------------------|------------------|---------------------------|---------------------|---------------------|------------------|
|                                                                                                                                       | Female           | Mother has college degree | Black, non-Hispanic | White, non-Hispanic | Hispanic         |
| <b>Observed Values</b>                                                                                                                |                  |                           |                     |                     |                  |
| 2017                                                                                                                                  | 51.0 (49.7-52.3) | 47.0 (44.3-49.8)          | 15.6 (12.9-18.8)    | 51.5 (46.9-56.1)    | 25.8 (21.9-30.1) |
| 2018                                                                                                                                  | 51.1 (49.7-52.4) | 46.2 (43.4-48.9)          | 13.1 (10.5-16.3)    | 52.0 (47.3-56.7)    | 29.2 (25.3-33.4) |
| 2019                                                                                                                                  | 51.4 (50.1-52.8) | 47.0 (44.3-49.8)          | 13.3 (10.8-16.2)    | 52.9 (48.2-57.6)    | 28.3 (24.5-32.5) |
| 2020                                                                                                                                  | 50.6 (47.4-53.8) | 48.6 (42.9-54.4)          | 13.2 (8.0-20.9)     | 53.0 (42.4-63.4)    | 29.3 (20.5-40.0) |

Note: These results graphed in the eFigure. 95% confidence intervals are in parentheses. Differences between 2020 and 2019 estimates are not significantly different at  $p < .05$  for a two-tailed test for any of these outcomes.

| <b>eTable 3: Comparison of Lifetime Use Levels of Selected Drugs in 2020 with Previous Years among U.S. 10<sup>th</sup> and 12<sup>th</sup> Grade Students</b> |                  |               |                  |                  |
|----------------------------------------------------------------------------------------------------------------------------------------------------------------|------------------|---------------|------------------|------------------|
|                                                                                                                                                                | Marijuana        | Hallucinogens | Alcohol          | Got Drunk        |
| <b>Observed Values</b>                                                                                                                                         |                  |               |                  |                  |
| 2017                                                                                                                                                           | 37.3 (35.5-39.2) | 5.3 (4.8-5.9) | 51.2 (49.1-53.2) | 29.5 (27.7-31.3) |
| 2018                                                                                                                                                           | 37.6 (35.9-39.4) | 5.1 (4.6-5.6) | 50.2 (48.4-52.0) | 29.8 (27.9-31.8) |
| 2019                                                                                                                                                           | 38.5 (36.9-40.2) | 5.7 (5.1-6.3) | 50.2 (48.3-52.2) | 28.8 (26.9-30.8) |
| 2020                                                                                                                                                           | 38.0 (35.1-41.1) | 5.9 (5.0-7.0) | 53.3 (48.7-57.9) | 31.6 (26.9-36.7) |

Note: These results graphed in the eFigure. 95% confidence intervals are in parentheses. Selected substances had highly consistent prevalence levels from 2017-2019, which was expected to continue in 2020. Differences between 2020 and 2019 estimates are not significantly different at  $p < .05$  for a two-tailed test for any of these outcomes.



| <b>eTable 4: Observed Prevalence of Nicotine Vaping by Year and Reporting Interval, And Coefficients for Predicted Values</b> |                            |                               |                               |                               |
|-------------------------------------------------------------------------------------------------------------------------------|----------------------------|-------------------------------|-------------------------------|-------------------------------|
|                                                                                                                               | Daily Use*                 | Past 30-Day Use               | Past 12-month Use             | Lifetime Use                  |
| <b>Observed Values</b>                                                                                                        |                            |                               |                               |                               |
| 2017                                                                                                                          |                            | 9.5 (8.2-10.8)                | 17.2 (15.5-18.9)              | 23.1 (21.3-24.9)              |
| 2018                                                                                                                          |                            | 18.3 (16.4-20.4) <sup>a</sup> | 27.0 (24.6-29.4) <sup>a</sup> | 31.1 (28.7-33.5) <sup>a</sup> |
| 2019                                                                                                                          | 9.1 (8-10.2)               | 22.5 (20.7-24.4) <sup>a</sup> | 32.8 (30.8-35.0) <sup>a</sup> | 38.4 (36.2-40.6) <sup>a</sup> |
| 2020                                                                                                                          | 7.0 (5.6-8.7) <sup>a</sup> | 21.8 (18.6-25.2)              | 32.4 (28.4-36.7)              | 41.3 (36.9-45.7)              |
|                                                                                                                               |                            |                               |                               |                               |
| <b>Logistic Regression Results for Predicted Values<sup>b</sup></b>                                                           |                            |                               |                               |                               |
| Year                                                                                                                          |                            | 0.9 (0.7 - 1.1)               | 0.7 (0.5 - 0.9)               | 0.5 (0.3 - 0.7)               |
| Year <sup>2</sup>                                                                                                             |                            | -0.2 (-0.3 - -0.1)            | -0.1 (-0.2 - -0.08)           | -0.1 (-0.1 - -0.01)           |
| Constant                                                                                                                      |                            | -2.2 (-2.4 - -2.1)            | -1.6 (-1.7 - -1.5)            | -1.2 (-1.3 - -1.1)            |

Note: 95% confidence intervals are in parentheses

\* Daily use defined as use on 20+ days in the last 30 days and was not measured before 2019

<sup>a</sup> Prevalence level significantly different from previous year at p<.05 for a two-tailed test

<sup>b</sup> Year is centered at 2017 and coefficients are unexponentiated. All coefficients are statistically significant at p<.05 for a two-tailed test, as indicated by 95% confidence intervals that do not include zero.

| <b>eTable 5: Prevalence of JUUL Use by Year and Reporting Interval</b> |                            |                               |                               |                  |
|------------------------------------------------------------------------|----------------------------|-------------------------------|-------------------------------|------------------|
|                                                                        | Daily Use*                 | Past 30-Day Use               | Past 12-month Use             | Lifetime Use     |
| <b>Observed Values</b>                                                 |                            |                               |                               |                  |
| 2019                                                                   | 6.3 (5.3-7.5)              | 19.6 (17.7-21.6)              | 28.5 (26.2-31.0)              | 32.9 (30.5-35.4) |
| 2020                                                                   | 2.1 (1.7-2.6) <sup>a</sup> | 12.6 (10.7-14.7) <sup>a</sup> | 21.3 (19.6-23.0) <sup>a</sup> | 33.2 (28.5-38.3) |

Note: 95% confidence intervals are in parentheses

\* Daily use defined as use on 20+ days in the last 30 days.

<sup>a</sup> Prevalence level significantly different from previous year at p<.05 for a two-tailed test

| <b>eTable 6: Sample Sizes by Survey Question and Year for Surveys Collected on March 14<sup>th</sup> or Earlier in All Years</b> |                        |       |       |       |
|----------------------------------------------------------------------------------------------------------------------------------|------------------------|-------|-------|-------|
| Question                                                                                                                         | Unweighted Sample Size |       |       |       |
|                                                                                                                                  | 2017                   | 2018  | 2019  | 2020  |
| Nicotine Vaping <sup>a,b</sup>                                                                                                   | 1,680                  | 2,395 | 5,286 | 8,392 |
| JUUL use <sup>a</sup>                                                                                                            |                        |       | 1,223 | 8,443 |
| Vaping brand <sup>c</sup>                                                                                                        |                        |       | 556   | 1,744 |
| Perceived Accessibility of Vaping Devices <sup>c,d</sup>                                                                         | 112                    | 335   | 416   | 546   |
| Perceived Accessibility of Nicotine Solutions for Vaping <sup>c,d</sup>                                                          | 112                    | 335   | 415   | 690   |
| Perceived Accessibility of Flavored Nicotine Solutions <sup>c</sup>                                                              |                        |       |       | 688   |
| Perceived Risk of Nicotine Vaping                                                                                                | 1,700                  | 2,488 | 2,752 | 3,474 |
| Female                                                                                                                           | 4,985                  | 7,101 | 8,139 | 8,430 |
| Mother Has College Education                                                                                                     | 4,763                  | 6,834 | 7,616 | 7,764 |
| Race/Ethnicity                                                                                                                   | 4,974                  | 7,163 | 8,025 | 8,145 |
| Lifetime Marijuana Use                                                                                                           | 5,069                  | 7,288 | 8,211 | 8,390 |
| Lifetime Hallucinogen Use                                                                                                        | 4,693                  | 6,675 | 7,627 | 7,822 |
| Lifetime Alcohol Use                                                                                                             | 4,951                  | 7,147 | 8,091 | 8,220 |
| Lifetime Getting Drunk                                                                                                           | 3,363                  | 4,656 | 5,462 | 5,700 |

Note: For question wording and response categories see eTable 1. Estimates for all measures are nationally-representative.

Sample sizes vary both due to size of randomly-selected subgroup that received questions and also the abbreviated data collection in 2020. In 2019 a randomly-selected half of schools recorded their answers on electronic tablets and in the other half used paper and pencil. In all analyses responses from both survey modes are combined because prevalence differences across the modes were negligible. (Before 2019 all responses were on paper and pencil, and in 2020 all responses were on electronic tablets.)

<sup>a</sup>Across reporting intervals (e.g., lifetime, past 12-month, past 30-day, and daily) sample size varies between 99% and 100% of sample size reported here.

<sup>b</sup>The example of JUUL was first added to the stem question for a randomly-selected half of these questions in 2019. Prevalence of nicotine vaping was 3 points higher on questionnaires with the JUUL example compared to those without it. All questionnaires included the example of JUUL in the stem question in 2020.

<sup>c</sup>Sample size in analyses and reported here restricted to youth who vaped nicotine in the past 30 days.

<sup>d</sup>JUUL first included as an example in the stem question in 2020, for all questionnaires on which this question appeared.

**eTable 7: Comparison of 2020 Demographics with Previous Years among U.S. 10<sup>th</sup> and 12<sup>th</sup> Grade Students, Samples in All Years Limited to Surveys Collected on March 14 or Earlier**

|                        | Female           | Mother has college degree | Black, non-Hispanic | White, non-Hispanic | Hispanic         |
|------------------------|------------------|---------------------------|---------------------|---------------------|------------------|
| <b>Observed Values</b> |                  |                           |                     |                     |                  |
| 2017                   | 49.6 (46.5-52.7) | 49.7 (42.7-56.8)          | 11.5 (8.1-16.2)     | 60.5 (52.1-68.3)    | 21.9 (15.2-30.6) |
| 2018                   | 50.0 (46.7-53.2) | 49.4 (44.7-54.1)          | 9.4 (5.0-17.1)      | 58.5 (48.7-67.6)    | 27.6 (21.3-35.0) |
| 2019                   | 52.9 (49.7-56.0) | 47.4 (42.9-52.0)          | 13.6 (9.5-19.2)     | 55.3 (45.7-64.5)    | 26.9 (20.6-34.4) |
| 2020                   | 50.6 (47.4-53.8) | 48.6 (42.9-54.4)          | 13.2 (8.0-20.9)     | 53.0 (42.4-63.4)    | 29.3 (20.5-40.0) |

Note: 95% confidence intervals are in parentheses. Differences between 2020 and 2019 estimates are not significantly different at  $p < .05$  for a two-tailed test for any of these outcomes.

**eTable 8: Comparison of Lifetime Use Levels of Selected Drugs in 2020 with Previous Years among U.S. 10<sup>th</sup> and 12<sup>th</sup> Grade Students, Samples in All Years Limited to Survey Collected on March 14 or Earlier**

|                        | Marijuana        | Hallucinogens | Alcohol          | Got Drunk        |
|------------------------|------------------|---------------|------------------|------------------|
| <b>Observed Values</b> |                  |               |                  |                  |
| 2017                   | 34.3 (30.8-38.1) | 4.5 (3.5-5.8) | 51.5 (46.9-56.0) | 31.1 (27.5-34.9) |
| 2018                   | 33.8 (30.0-37.8) | 5.4 (4.5-6.6) | 50.5 (47.1-54.0) | 29.9 (25.7-34.4) |
| 2019                   | 36.0 (33.0-39.1) | 6.0 (5.0-7.0) | 50.2 (46.4-53.9) | 28.0 (24.4-31.9) |
| 2020                   | 38.0 (35.1-41.1) | 5.9 (5.0-7.0) | 53.3 (48.7-57.9) | 31.6 (26.9-36.7) |

Note: 95% confidence intervals are in parentheses. Selected substances had highly consistent prevalence levels from 2017-2019, which was expected to continue in 2020. Differences between 2020 and 2019 estimates are not significantly different at  $p < .05$  for a two-tailed test for any of these outcomes.

| <b>eTable 9: Observed Prevalence of Nicotine Vaping by Year and Reporting Interval for Surveys Collected on March 14<sup>th</sup> or Earlier in All Years</b> |                |                               |                               |                               |
|---------------------------------------------------------------------------------------------------------------------------------------------------------------|----------------|-------------------------------|-------------------------------|-------------------------------|
|                                                                                                                                                               | Daily Use*     | Past 30-Day Use               | Past 12-month Use             | Lifetime Use                  |
| <b>Observed Values</b>                                                                                                                                        |                |                               |                               |                               |
| 2017                                                                                                                                                          |                | 9.5 (7.2-12.4)                | 18.3 (15.0-22.2)              | 23.5 (19.7-27.8)              |
| 2018                                                                                                                                                          |                | 17.6 (14.0-22.0) <sup>a</sup> | 26.6 (22.1-31.7) <sup>a</sup> | 30.6 (25.7-36.0) <sup>a</sup> |
| 2019                                                                                                                                                          | 8.7 (6.5-11.5) | 20.8 (17.0-25.1)              | 31.4 (27.0-36.2)              | 36.8 (32.3-41.6)              |
| 2020                                                                                                                                                          | 7.0 (5.6-8.6)  | 21.8 (18.6-25.2)              | 32.4 (28.4-36.7)              | 41.3 (36.9-45.7)              |
|                                                                                                                                                               |                |                               |                               |                               |
| <b>Logistic Regression Results for Predicted Values<sup>b</sup></b>                                                                                           |                |                               |                               |                               |
| Year                                                                                                                                                          |                | 0.7 (0.3 - 1.2)               | 0.6 (0.2 - 0.9)               | 0.4 (0.1 - 0.7)               |
| Year <sup>2</sup>                                                                                                                                             |                | -0.1 (-0.3 - -0.02)           | -0.1 (-0.2 - 0.001)           | -0.04 (-0.1 - 0.1)            |
| Constant                                                                                                                                                      |                | -2.2 (-2.5 - -1.9)            | -1.5 (-1.7 - -1.3)            | -1.2 (-1.4 - -1.0)            |

Note: 95% confidence intervals are in parentheses

\* Daily use defined as use on 20+ days in the last 30 days and was not measured before 2019

<sup>a</sup> Prevalence level significantly different from previous year at p<.05 for a two-tailed test

<sup>b</sup> Year is centered at 2017 and coefficients are unexponentiated. Coefficients are statistically significant at p<.05 for a two-tailed test when 95% confidence intervals do not include zero.

| <b>eTable 10: Prevalence of JUUL Use by Year and Reporting Interval for Surveys Collected on March 14<sup>th</sup> or Earlier in All Years</b> |                            |                               |                               |                  |
|------------------------------------------------------------------------------------------------------------------------------------------------|----------------------------|-------------------------------|-------------------------------|------------------|
|                                                                                                                                                | Daily Use*                 | Past 30-Day Use               | Past 12-month Use             | Lifetime Use     |
| <b>Observed Values</b>                                                                                                                         |                            |                               |                               |                  |
| 2019                                                                                                                                           | 6.2 (4.5-8.5)              | 17.6 (14.1-21.6)              | 26.9 (22.8-31.4)              | 30.9 (26.3-35.8) |
| 2020                                                                                                                                           | 2.1 (1.7-2.6) <sup>a</sup> | 12.6 (10.6-14.8) <sup>a</sup> | 21.3 (19.6-23.0) <sup>a</sup> | 33.2 (28.5-38.3) |

Note: 95% confidence intervals are in parentheses

\* Daily use defined as use on 20+ days in the last 30 days.

<sup>a</sup> Prevalence level significantly different from previous year at p<.05 for a two-tailed test

| <b>eTable 11: Prevalence of Vaping Brands Reported Most Often Used among 10<sup>th</sup> and 12<sup>th</sup> Grade Students Who Vaped Nicotine in the Past 30 Days for Surveys Collected on March 14<sup>th</sup> or Earlier in All Years, by Year</b> |                                  |                                |                  |                    |                              |               |
|--------------------------------------------------------------------------------------------------------------------------------------------------------------------------------------------------------------------------------------------------------|----------------------------------|--------------------------------|------------------|--------------------|------------------------------|---------------|
|                                                                                                                                                                                                                                                        | JUUL                             | Other <sup>a</sup>             | SMOK             | Suorin             | Vuse                         | Stig          |
| <b>Observed Values</b>                                                                                                                                                                                                                                 |                                  |                                |                  |                    |                              |               |
| 2019                                                                                                                                                                                                                                                   | 50.6 (42.2-59.0)                 | 11.8 (8.4-16.1)                | 21.4 (14.7-29.9) | 14.7 (7.7-26.1)    | 1.7 (0.6-4.8)                |               |
| 2020                                                                                                                                                                                                                                                   | 41.1 (35.7-46.7)                 | 27.8 (23.1-33.0)               | 13.1 (9.2-18.4)  | 7.2 (4.4-11.7)     | 7.3 (4.8-11.1)               | 3.4 (1.9-6.1) |
| Absolute change in observed values from 2019-2020                                                                                                                                                                                                      | -9.5 (-18.9 - -0.1) <sup>b</sup> | 16.0 (9.9 - 22.1) <sup>b</sup> | -8.2 (-17 - 0.5) | -7.4 (-16.6 - 1.8) | 5.7 (2.1 - 9.3) <sup>b</sup> |               |

Note: 95% confidence intervals are in parentheses

<sup>a</sup> In 2020 30% of respondents in this category wrote in "Puff bar" or a spelling variant thereof, which makes this brand's prevalence the third highest, behind JUUL and SMOK, with a prevalence of 8% (8% = 30% of 28%, which is the size of the "Other" category).

<sup>b</sup> Prevalence level significantly different across years at  $p < .05$  for a two-tailed test, as indicated by 95% confidence intervals that do not include zero.



| <b>eTable 12: Percent 10<sup>th</sup> and 12<sup>th</sup> Grade Students Who Vaped Nicotine in the Past 30 Days and Reported Getting Selected Vaping Materials Would Be “Fairly Easy” or “Very Easy” for Surveys Collected on March 14<sup>th</sup> or Earlier in All Years, by Year</b> |                               |                               |                            |
|------------------------------------------------------------------------------------------------------------------------------------------------------------------------------------------------------------------------------------------------------------------------------------------|-------------------------------|-------------------------------|----------------------------|
|                                                                                                                                                                                                                                                                                          | Vaping Device                 | Nicotine Solution for Vaping  | Flavored Nicotine Solution |
| <b>Observed Values</b>                                                                                                                                                                                                                                                                   |                               |                               |                            |
| 2017                                                                                                                                                                                                                                                                                     | 92.6 (87.7-95.6)              | 94.0 (87.1-97.3)              |                            |
| 2018                                                                                                                                                                                                                                                                                     | 93.5 (90.0-95.8)              | 93.1 (90.0-95.3)              |                            |
| 2019                                                                                                                                                                                                                                                                                     | 93.9 (91.2-95.9)              | 93.6 (90.1-95.9)              |                            |
| 2020                                                                                                                                                                                                                                                                                     | 86.4 (82.7-89.3) <sup>a</sup> | 83.0 (78.5-86.7) <sup>a</sup> | 79.8 (74.9-83.9)           |
|                                                                                                                                                                                                                                                                                          |                               |                               |                            |
| <b>Logistic Regression Results for Predicted Values<sup>b</sup></b>                                                                                                                                                                                                                      |                               |                               |                            |
| Year                                                                                                                                                                                                                                                                                     | 0.6 (-0.1 - 1.4)              | 0.5 (-0.4 - 1.4)              |                            |
| Year <sup>2</sup>                                                                                                                                                                                                                                                                        | -0.3 (-0.5 - -0.1)            | -0.3 (-0.5 - -0.03)           |                            |
| Constant                                                                                                                                                                                                                                                                                 | 2.4 (1.9 - 2.9)               | 2.6 (1.9 - 3.3)               |                            |

Note: 95% confidence intervals are in parentheses

<sup>a</sup> Prevalence level significantly different from previous year at p<.05 for a two-tailed test

<sup>b</sup> Year is centered at 2017 and coefficients are unexponentiated. Coefficients are statistically significant at p<.05 for a two-tailed test when 95% confidence intervals do not include zero.

| <b>eTable 13: Percent of 10<sup>th</sup> and 12<sup>th</sup> Grade Students Who Report Perceived Risk of “Great Harm” from Occasional and Regular Nicotine Vaping for Surveys Collected on March 14<sup>th</sup> or Earlier in All Years, by Year</b> |                               |                               |
|-------------------------------------------------------------------------------------------------------------------------------------------------------------------------------------------------------------------------------------------------------|-------------------------------|-------------------------------|
|                                                                                                                                                                                                                                                       | Occasional Nicotine Vaping    | Regular Nicotine Vaping       |
| <b>Observed Values</b>                                                                                                                                                                                                                                |                               |                               |
| 2017                                                                                                                                                                                                                                                  | 16.7 (14.2-19.4)              | 28.9 (25.8-32.2)              |
| 2018                                                                                                                                                                                                                                                  | 16.2 (14.1-18.4)              | 29.9 (26.4-33.6)              |
| 2019                                                                                                                                                                                                                                                  | 20.2 (18.0-22.6) <sup>a</sup> | 39.4 (36.3-42.6) <sup>a</sup> |
| 2020                                                                                                                                                                                                                                                  | 27.2 (24.8-29.8) <sup>a</sup> | 49.3 (46.5-52.0) <sup>a</sup> |
|                                                                                                                                                                                                                                                       |                               |                               |
| <b>Logistic Regression Results for Predicted Values<sup>b</sup></b>                                                                                                                                                                                   |                               |                               |
| Year                                                                                                                                                                                                                                                  | -0.1 (-0.3 - 0.2)             | 0.05 (-0.2 - 0.3)             |
| Year <sup>2</sup>                                                                                                                                                                                                                                     | 0.1 (0.03 - 0.2)              | 0.1 (0.01 - 0.2)              |
| Constant                                                                                                                                                                                                                                              | -1.6 (-1.8 - -1.4)            | -0.9 (-1.1 - -0.8)            |

Note: 95% confidence intervals are in parentheses

<sup>a</sup> Prevalence level significantly different from previous year at p<.05 for a two-tailed test

<sup>b</sup> Year is centered at 2017 and coefficients are unexponentiated. Coefficients are statistically significant at p<.05 for a two-tailed test when 95% confidence intervals do not include zero.
